# Supplementary material for: Structural evolution during sodium deintercalation/intercalation in Na2/3[Fe1/2Mn1/2]O2
Source: Royal Society of Chemistry journal article supplement (doi:10.1039/c4ta06360k), 2015-01-01
Supplement: c4ta06360k1.pdf [file c4ta06360k1.pdf]

## Supporting Information

Title: Structure and Dynamics of P2 Na<sub>2/3</sub>[Fe<sub>1/2</sub>Mn<sub>1/2</sub>]O<sub>2</sub> During Sodiation/Desodiation Process

Authors : Gurpreet Singh,<sup>a</sup> J.M. Lopez del Amo,<sup>a</sup> Montserrat Galceran,<sup>a</sup> Sofia Pérez-Villar,<sup>a</sup> and Teofilo Rojo<sup>a</sup>

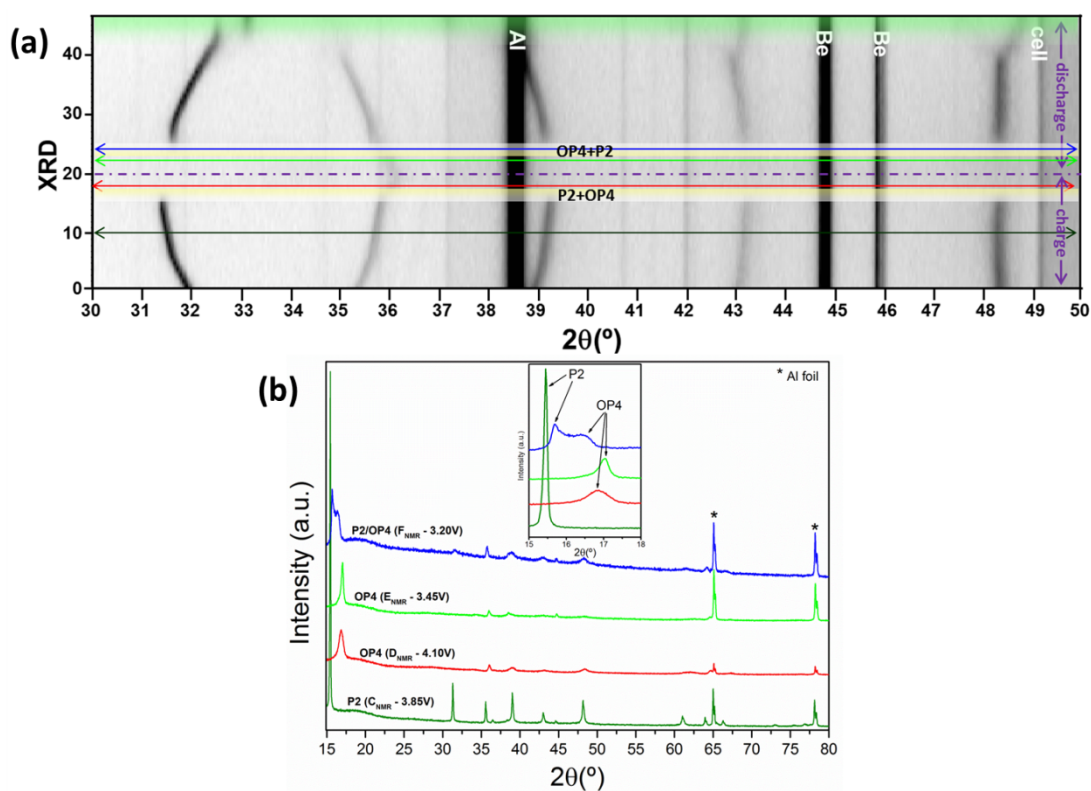

**Figure S1.** (a) 2theta versus time plot of the XRD patterns comprising a full cycle (charge and discharge). The level of grey indicates the relative intensity (the darker the more intense). The gradient areas show the biphasic regions. (b) Ex-situ XRD at different voltages according to the NMR measurements

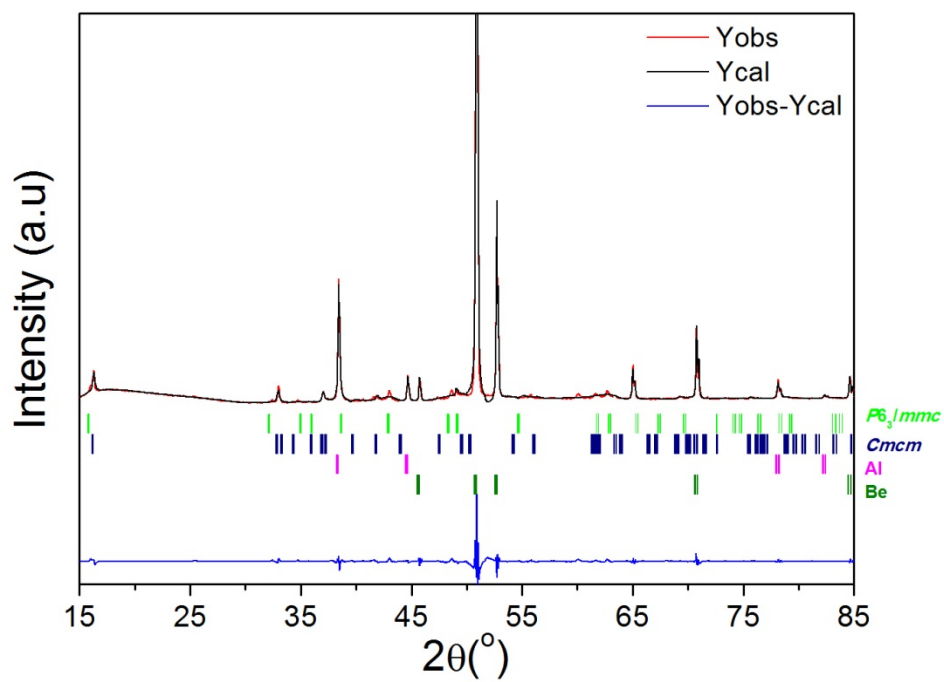

**Fig. S2** : Refined X-ray diffraction pattern at the end of the first discharge showing the orthorhombic phase
